# Identification of QTL and Underlying Genes for Root System Architecture associated with Nitrate Nutrition in Hexaploid Wheat

1 **Running head: Wheat Root Nitrate Responsive QTL and Genes**

2 **Marcus Griffiths<sup>1</sup>, Jonathan A. Atkinson<sup>1</sup>, Laura-Jayne Gardiner<sup>2</sup>, Ranjan Swarup<sup>1</sup>, Michael P. Pound<sup>3</sup>, Michael**  
3 **H. Wilson<sup>1</sup>, Malcolm J. Bennett<sup>1</sup> & Darren M. Wells<sup>1\*</sup>**

4 <sup>1</sup>School of Biosciences, University of Nottingham, Sutton Bonington Campus, LE12 5RD, UK.

5 <sup>2</sup>IBM Research, Warrington, WA4 4AD, UK.

6 **\*Corresponding author:** [darren.wells@nottingham.ac.uk](mailto:darren.wells@nottingham.ac.uk)

7 **Abstract**

8 The root system architecture (RSA) of a crop has a profound effect on the uptake of nutrients and consequently the potential  
9 yield. However, little is known about the genetic basis of RSA and resource adaptive responses in wheat (*Triticum aestivum*  
10 L.). Here, a high-throughput germination paper plant phenotyping system was used to identify seedling traits in a wheat  
11 doubled haploid mapping population, Savannah × Rialto. Significant genotypic and nitrate-N treatment variation was found  
12 across the population for seedling traits with distinct trait grouping for root size-related traits and root distribution-related  
13 traits. Quantitative trait locus (QTL) analysis identified a total of 59 seedling trait QTLs. Across two nitrate treatments, 27  
14 root QTLs were specific to the nitrate treatment. Transcriptomic analyses for one of the QTLs on chromosome 2D found  
15 under low nitrate conditions was pursued revealing gene enrichment in N-related biological processes and 17 candidate up-  
16 regulated genes with possible involvement in a root angle response. Together, these findings provide genetic insight into  
17 root system architecture and plant adaptive responses to nitrate and provide targets that could help improve N capture in  
18 wheat.

19 **Keywords: Doubled-haploid population, Nitrate, RNA-seq, Quantitative trait loci, Root system architecture,**  
20 ***Triticum aestivum* L. (wheat).**

21

## 22 1 Introduction

23 Nitrogen (N) is an essential macronutrient for plant growth and development with agriculture greatly dependent on synthetic  
24 N fertilisers for enhancing productivity. Global demand for fertilisers is projected to rise by 1.5% each year reaching 201.7  
25 million tonnes in 2020, over half of which (118.8 million tonnes) is for nitrate fertilizers (FAO, 2017). However, there are  
26 compelling economic and environmental reasons to reduce N fertiliser use in agriculture, particularly as the N fixing process  
27 is reliant on unsustainable fossil fuels (Dawson *et al.*, 2008).

28 The availability of nutrients is spatially and temporally heterogeneous in the soil (Lark *et al.*, 2004; Miller *et al.*, 2007).  
29 Roots therefore need to forage for such resources. The spatial arrangement of the root system, called the root system  
30 architecture (RSA) (Hodge *et al.*, 2009), has a profound effect on the uptake of nutrients and consequently the potential  
31 yield. Optimisation of the RSA could significantly improve the efficiency of resource acquisition and in turn increase the  
32 yield potential of the crop. An improvement in N use efficiency (NUE) by just 1% could reduce fertiliser losses and save  
33 ~\$1.1 billion annually (Delogu *et al.*, 1998; Kant *et al.*, 2010).

34 Understanding the contribution of root traits to RSA and function is of central importance for improving crop productivity.  
35 Roots however are inherently challenging to study leading to the wide use of artificial growth systems for plant phenotyping  
36 as they are generally high-throughput, allow precise control of environmental parameters and are easy to replicate. These  
37 phenotyping systems have been key for generating root phenotypic data for association mapping and uncovering underlying  
38 genetic mechanisms (Ren *et al.*, 2012; Clark *et al.*, 2013; Atkinson *et al.*, 2015; Zurek *et al.*, 2015; Yang *et al.*, 2020). Such  
39 seedling phenotyping approaches have uncovered QTL for root system architectural traits on chromosome regions that have  
40 also been found in field trials for related traits (Bai *et al.*, 2013; Atkinson *et al.*, 2015). Only a limited number of studies  
41 have directly compared seedling screens to mature root traits in the field and overall results have been inconsistent, which  
42 likely reflects the lack of environmental control in the field, that seedling studies focus on the seminal root system and not  
43 the crown root system, and that field approaches for RSA research is in need of further development (Watt *et al.*, 2013;  
44 Rich *et al.*, 2020).

45 For many cereal crops, understanding the genetic basis of RSA is complex due to the polyploid nature and large genome  
46 sizes. Therefore, quantitative trait loci (QTL) analyses have been very useful for precisely linking phenotypes to regions of  
47 a chromosome. With the development of high-throughput RNA sequencing technology (RNA-seq), identified QTL can  
48 now be further dissected to the gene level. Using RNA-seq, a substantial number of genes and novel transcripts have been  
49 identified in cereal crops including rice, sorghum, maize and wheat that are implicated in RSA control (Oono *et al.*, 2013;  
50 Gelli *et al.*, 2014; Akpınar *et al.*, 2015; Yu *et al.*, 2015). To our knowledge, there are no other studies that have identified  
51 genes related to nitrate response or root angle change in wheat. The uncovering of these genes and mechanisms are likely  
52 to be of agronomical importance as they can then be implemented in genomics-assisted breeding programs to improve N-  
53 uptake efficiency in crops.

54 The aim of this study was to identify root traits and genes that relate to N uptake and plasticity in wheat. To achieve this, a  
55 germination paper-based system was used to phenotype a wheat doubled haploid (DH) mapping population under two N  
56 regimes. The nitrate-N levels were changed to determine the seedling responses to high- and low-affinity transport relevant  
57 concentrations as would be experienced in the field. Here we present genomic regions and underlying genes that we  
58 propose may control root size and root distribution responses in wheat to nitrate.

59

## 60 2 Results

### 61 2.1 Phenotypic variation in a wheat doubled haploid population for seedling traits and nitrate effects

62 Seedlings for 92 lines of the S×R DH mapping population and parents were grown hydroponically in a controlled  
63 environment chamber under high and low nitrate treatments (Fig. 1). Roots and shoots of each seedling were individually  
64 imaged 10 days after germination resulting in 6924 images. The results of ANOVA indicated that the variance for the  
65 genotype effects for all investigated seedling traits were highly significant ( $p < 0.001$ ) (Table S1). Across the wheat  
66 population many of the root size and root distribution traits were found to be nitrate treatment-dependent. Interestingly, no  
67 significant differences were observed across the population for total root length in response to the nitrate treatment, however  
68 the root class distribution between lateral ( $p < 0.001$ ) and seminal ( $p < 0.01$ ) root length was significantly affected with a  
69 G×N-treatment interaction ( $p < 0.001$ ). In addition, seminal root angle traits and width-depth related traits had significant  
70 nitrate treatment effects ( $p < 0.05$ ). The seedling traits measured were also highly heritable with heritability scores for root  
71 length and count traits between 0.78-0.97, root distribution traits between 0.4-0.97, root angle traits between 0.51-0.84 and  
72 shoot traits between 0.77-0.84 (Table S1).

### 73 2.2 Wheat root phenotypic traits segregate into two distinct clusters by size and distribution

74 For the S×R DH population and parents a principal component analysis (PCA) was conducted to explore relationships  
75 within the root phenotypic traits (Fig. 2A). N treatment did not affect the PCA trait loadings or correlations between the  
76 traits (Fig. S1) so the analyses were conducted with both treatments together. Over 71% of the trait variation could be  
77 explained by the first two principal components and 90% of the trait variation could be explained by the first six principal  
78 components. The loadings were mostly split between root size related traits and root distribution traits (Fig. 2A). A  
79 correlation matrix of the whole dataset demonstrated the strong correlation between root size related traits and root  
80 distribution related traits (Fig. 2B). Of all the plant traits measured, the width-depth ratio traits were found to be positively  
81 correlated with the greatest number of traits from both trait groups, plant size and root distribution. In addition, the  
82 correlation analysis also highlighted negative associations between root size and angle traits.

### 83 2.3 Identification of novel root QTLs in the S×R DH population

84 Using normalized phenotypic data with a high-density Savannah × Rialto iSelect map, a total of 59 QTLs were discovered  
85 for seedling traits of which 41 QTLs had positive effect alleles that came from Savannah, and 18 from Rialto (Fig. 3, Table  
86 2). QTLs were found on chromosomes 1A, 1B, 2D, 3B, 4D, 6D, 7A and 7D, with 25 QTLs located on 6D. For the rooting  
87 traits a total of 55 QTLs were found across two nitrate treatments, 23 of which were identified under the low nitrate  
88 treatment and 32 for the high nitrate treatment. Nine root QTLs were found to be only present in the low nitrate treatment,  
89 18 root QTLs were found only in the high nitrate treatment and 14 root QTLs (28 total) were present in both nitrate  
90 treatments. The trait ANOVA results also support the root QTLs found are nitrate condition dependent. Phenotypic variation  
91 explained by QTLs varied from 3.8 to 82.9%. Of the QTLs found, there appear to be 13 underlying root QTLs, as many  
92 root size and root distribution class traits co-localized at the same chromosome region. Two QTLs involved in shoot size  
93 traits, which were identified on chromosomes 6D and 7D under low N, were colocalized with the corresponding QTLs of  
94 root size traits. N-dependent QTLs of some traits on chromosomes 6D and 7D were colocalized with N-independent QTLs  
95 of other root size traits. For QTLs associated with nitrate treatment, QTLs for root size were found on chromosomes 1A,  
96 6D and 7D and for root angle on chromosomes 2D, 3B and 4D. Of these regions a candidate root angle QTL (RAE1001)  
97 residing on chromosome 2D was taken forward. For this QTL, a positive allele from Rialto conferred a root angle change  
98 in the low nitrate treatment that co-localised with other root angle traits and explained 14.3% of phenotypic variation with  
99 a small peak confidence region (25 cM) (Table 2).

## 100 2.4 Differentially regulated candidate genes for a root angle QTL identified by RNA-seq analysis

101 The lines selected for the RNA-seq analysis were based on the largest observed phenotypic differences for the trait  
102 associated with a root angle QTL located on chromosome 2D (RAE1001), found under low nitrate conditions. The DH  
103 population showed transgressive segregation with trait values more extreme than the parents (Fig. 4A). Under low nitrate  
104 there was a 30° difference in root angle ( $p < 0.001$ ) between the extremes of the population with four lines of each taken  
105 forward for RNA-seq (Fig. 4B and C). The samples groups were also different for response to N with a significantly steeper  
106 root angle under low-nitrate in one of the groups ( $p < 0.05$ ) (Fig. 4B).

107 One sample group was comprised of lines that had the candidate QTL with a positive effect from the parent Rialto (Group  
108 A: lines 17, 20, 36, 68) and the second sample group with parental origin from Savannah (Group B: lines 6, 8, 11, 52). As  
109 there was no single clear enriched region for the root QTL located on chromosome 2D, the whole chromosome was  
110 considered for differential gene expression analysis. A total of 3299 differentially expressed genes were identified in the  
111 analysed groups. We then focused on the identification of genes that were consistently overexpressed in Group A compared  
112 to Group B that could be driving the QTL. 1857 differentially expressed genes showed significant ( $q < 0.05$ ) up-regulation  
113 in Group A (with the QTL) compared to Group B (without QTL) considering all four biological replicates in each case. Of  
114 these, 88 gene candidates resided on chromosome 2D. Additionally, MaSuRcA transcript assemblies were considered that  
115 were identified as significantly ( $q < 0.05$ ) up-regulated in Group A compared Group B on chromosome 2D bringing the  
116 total to 93 (88 plus five) differentially expressed candidate sequences (Table S2). The inclusion of *de novo* assembled  
117 transcript sequences in the analysis factors for varietal specific genes that are not present in the Chinese Spring reference  
118 sequences. The sequencing read depth and alignment statistics are provided in Table S3. Of the 93 differentially expressed  
119 candidate sequences in Table S2, 17 candidate genes were consistently expressed across the Group A replicates versus zero  
120 reads mapping in one or more Group B replicates and were therefore considered as our primary candidates (Table 3). There  
121 were also 1442 differentially expressed genes that showed significant ( $q < 0.05$ ) down-regulation in Group A (with the  
122 QTL) compared to Group B (without QTL). Of these, 65 were annotated as residing on chromosome 2D (Table S2).

123 Functional categories for the significantly up- and down-regulated genes were evaluated using g:profiler between  
124 contrasting sample groups for a root QTL found under low nitrate conditions. For terms relating to biological processes  
125 there were 58 up-regulated terms that had the same lowest  $p$ -value including "nitrogen compound metabolic process",  
126 "cellular nitrogen compound metabolic process", "regulation of nitrogen compound metabolic process" and "cellular  
127 nitrogen compound biosynthetic process" (Fig. 5). For the down-regulated terms, three of the top 10 terms included  
128 "nitrogen compound metabolic process", "organonitrogen compound metabolic process" and "cellular nitrogen compound  
129 metabolic process" (Fig. 5). The complete list of enriched GO terms for molecular function, biological process and cellular  
130 component are available in Table S4. For the candidate root angle QTL found under low nitrate conditions (RAE1001)  
131 there were several N-related biological processes up- and down-regulated between the sample groups. In addition, within  
132 the candidate gene list an up-regulated NPF family gene, TraesCS2D02G348400, was identified which was consistently  
133 expressed across Group A and zero reads mapping in Group B. As this gene was expressed at low nitrate and within the  
134 identified QTL interval, *BS00010393-BS00066132\_51*, the function of this gene was pursued. A phylogenetic analysis of  
135 protein families was conducted comparing NPF family protein sequences of *A. thaliana*, *O. sativa* and *T. aestivum* (Fig.  
136 S2). A total of 53 *A. thaliana* proteins, 130 *O. sativa* proteins and 391 *T. aestivum* proteins were aligned using MUSCLE  
137 with 1000 bootstrap interactions and 20 maximum likelihood searches (Edgar, 2004). The candidate *T. aestivum* protein  
138 TraesCS2D02G348400 is situated in a monocot specific sub-clade within the NPF4 clade (Fig. 6). This clade includes *A.*  
139 *thaliana* NPF members AtNPF4.1, AtNPF4.2, AtNPF4.3, AtNPF4.4, AtNPF4.5, AtNPF4.6 and AtNPF4.7. In addition, the  
140 candidate protein is closely related to a rice nitrate(chlorate)/proton symporter protein LOC\_Os04g41410.

141

### 142 3 Discussion

143 Root system architecture is an important agronomic trait as the growth, development and spatial distribution of the root  
144 system affects the availability of soil resources that a plant can capture. Roots are challenging to phenotype in soil however  
145 without disturbing the spatial arrangement and therefore non-destructive root phenotyping systems such as germination  
146 paper screens and X-ray CT are invaluable tools for such work (Bai *et al.*, 2013; Atkinson *et al.*, 2015; Mooney *et al.*,  
147 2012). In this study a germination paper-based system was used to phenotype a wheat doubled haploid (DH) mapping  
148 population under two nitrate-N regimes as it is a suitable approach for population-size root phenotyping with precise  
149 nutrition control.

150 Within the Savannah × Rialto DH mapping population, significant genotypic and nitrate treatment dependent phenotypic  
151 variation was observed in seedling traits (Table S1). Overall, the seedling traits could be separated into two main groups of  
152 related traits which were for root size and root distribution. In the root size trait group, it was found that the population had  
153 significant nitrate responsive plasticity in root length distribution. Interestingly the root class length of seminal and lateral  
154 roots was significantly affected by nitrate treatment, yet overall, the total root length was not significantly different. The  
155 root distribution-related traits group appeared to be the most responsive to nitrate treatment in this physiological screen  
156 using the S×R DH mapping population. Both root length distribution and root angle are widely regarded as important traits  
157 that when plastic to abiotic stimuli, such as low N or drought, as a plant can change the root foraging distribution in the soil  
158 to find such resources (Ho *et al.*, 2005; Trachsel *et al.*, 2013).

159 Using high-throughput methods for growth and phenotyping enabled a whole wheat DH population to be scored for root  
160 and shoot traits and the data mapped to underlying chromosome regions by QTL analysis. Nitrate plasticity is a likely a  
161 component of these QTLs where they were only detected in one of the nitrate treatments. In addition, four QTLs were found  
162 for shoot size traits on chromosomes 6D and 7D in the low nitrate conditions (LOD > 2.0) (Fig. 3, Table 2). In the literature,  
163 there are also studies that have described QTL on regions associated with those found in this study for root and shoot  
164 seedling traits. In this study on chromosome 1A, it was found that the region is associated with lateral root traits under low  
165 nitrate conditions. Interestingly, chromosome 1A has been previously associated with lateral root length in wheat and rice  
166 (Ren *et al.*, 2012; Beyer *et al.*, 2018). Therefore, there are likely underlying genes on chromosome 1A which relate to  
167 resource foraging as they were found to affect root plasticity, tolerance and/or lateral root development increase grain yield  
168 in low input agricultural systems (An *et al.*, 2006; Landjeva *et al.*, 2008; Ren *et al.*, 2012; Good *et al.*, 2017; Guo *et al.*,  
169 2012; Zhang *et al.*, 2013; Liu *et al.*, 2013; Sun *et al.*, 2013). This chromosome 1A region has also been correlated to nitrate  
170 uptake in S×R DH field trials (Atkinson *et al.*, 2015) which would make this co-localized chromosome region an important  
171 candidate for further study with potential association between root traits and N uptake. In this study, root angle QTLs were  
172 also identified in the low nitrate conditions on chromosomes 2D, 3B and 4D. QTLs on these chromosomes have been  
173 described in other studies yet very few of these have measured root angle or distribution traits. From comparison with other  
174 studies that found root QTLs on chromosome 2D, it appears there may be an underlying gene or number of genes for  
175 seminal root development and/or plasticity (An *et al.*, 2006; Zhang *et al.*, 2013; Liu *et al.*, 2013). On chromosome 3B, other  
176 studies have found QTLs affecting root size and stress related traits or genes relating to N plasticity, uptake and mobilisation  
177 (An *et al.*, 2006; Habash *et al.*, 2007; Guo *et al.*, 2012; Zhang *et al.*, 2013; Bai *et al.*, 2013). On chromosome 4D, other  
178 studies have also found QTLs on this chromosome that indicates an underlying root development and/or root plasticity  
179 gene that may be affecting the root angle or distribution change (Zhang *et al.*, 2013; Bai *et al.*, 2013).

180 A seminal root angle QTL (LOD 3.0) on chromosome 2D found under low nitrate conditions was targeted for transcriptomic  
181 analysis. Significant GO enrichment in N-related biological processes were found in the chromosome region of lines with  
182 the QTL compared to those without indicating a differential low nitrate response in these lines. A total of 17 candidate up-  
183 regulated genes were identified that resided on chromosome 2D (Table 3). A more detailed list of the genes identified are  
184 given in Table S2. Two of the three genes with highest log changes plus four others have unknown function. Point mutation  
185 detection and mutant generation with TILLING or RNAi represent the next step to functionally characterise these genes. A  
186 promising candidate from the root transcriptomic analyses was an up-regulated nitrate transporter 1/peptide transporter  
187 (NPF) family gene NPF4 (TraesCS2D02G348400) in lines that had the root angle QTL. In *A. thaliana* and *O. sativa*, NPF  
188 family genes have important roles in lateral root initiation, branching and response to nitrate (Remans *et al.*, 2006; Krouk  
189 *et al.*, 2010; Fang *et al.*, 2013). However, no studies have reported genes controlling root angle change in wheat, to date. A  
190 phylogenetic analysis of protein families was conducted comparing the protein sequences of *A. thaliana*, *O. sativa* and *T.*  
191 *aestivum* to the candidate protein. The candidate *T. aestivum* protein is situated in a monocot specific sub-clade within the  
192 NPF4 clade and is closely related to a rice nitrate(chlorate)/proton symporter protein (LOC\_Os04g41410) (Fig. 6).  
193 Members of this clade are known for transporting the plant hormone abscisic acid (ABA) (AtNPF4.1 and AtNPF4.6) and  
194 have been demonstrated to have low affinity nitrate transport activity (AtNPF4.6) (Huang *et al.*, 1999; Kanno *et al.*, 2012).  
195 ABA is known to be a key regulator in root hydrotropism, a process that senses and drives differential growth towards

196 preferential water potential gradients (Antoni *et al.*, 2016; Takahashi *et al.*, 2002). As root angle is a determinant of root  
197 depth, pursuing this gene function is of agronomic importance for improving foraging capacity and uptake of nitrate in deep  
198 soil layers as seedling stage identified genes have been associated with yield-related traits (Xu *et al.*, 2018).

199 In summary, we identified 59 QTLs using a wheat seedling hydroponic system, 27 of which were for root traits found in  
200 nitrate treatment specific conditions, 14 (28 total) for root QTLs found in both treatments, and four QTLs for shoot size  
201 traits. Using transcriptome analyses we found gene enrichment in N-related biological processes which may form part of a  
202 nitrate treatment developmental response affecting root angle. These findings provide a genetic insight into plant N adaptive  
203 responses and provide targets that could help improve N capture in wheat.

## 204 4 Materials and methods

### 205 4.1 Plant materials

206 A winter wheat doubled haploid mapping population comprised of 94 lines was used for root phenotyping. The population  
207 was derived from an F<sub>1</sub> plant between cultivars Savannah and Rialto (Limagrains UK Ltd, Rothwell, UK). Both parents are  
208 UK winter wheat cultivars that were on the AHDB recommended list. Savannah is a National Association of British & Irish  
209 Millers (nabim) Group 4 feed cultivar first released in 1998. Rialto is nabim Group 2 bread-making cultivar first released  
210 in 1995. Previous field research had found that Rialto had differential grain yield in low N field trials compared to Savannah  
211 making it a promising population to characterize with limited root characterization in response to N (Gaju *et al.*, 2011).

### 212 4.2 Seedling phenotyping

213 Wheat seedlings were grown hydroponically using the system described in Atkinson *et al.* (2015) (Fig. 1). Seeds from the  
214 Savannah × Rialto doubled haploid (S×R DH) mapping population were sieved to a seed size range of 2.8–3.35 mm based  
215 on mean parental seed size. Seeds were surface sterilised in 5% (v/v) sodium hypochlorite for 12 minutes before three  
216 washes in dH<sub>2</sub>O. Sterilised seeds were laid on wet germination paper (Anchor Paper Company, St Paul, MN, USA) and  
217 stratified at 4°C in a dark controlled environment room for 5 days. After stratification seeds were transferred to a controlled  
218 environment room at 20/15°C, 12-hour photoperiod, 400 μmol m<sup>-2</sup> s<sup>-1</sup> PAR and kept in a light-tight container. After 48  
219 hours, uniformly germinated seedlings with ~5 mm radicle length were transferred to vertically orientated seedling pouches.

220 Seeds for 94 lines from the S×R DH mapping population were grown hydroponically either in high nitrate (3.13 mM NO<sub>3</sub><sup>-</sup>  
221 , 0.75 mM NH<sub>4</sub><sup>+</sup>) or low nitrate (0.23 mM NO<sub>3</sub><sup>-</sup>, 0.75 mM NH<sub>4</sub><sup>+</sup>) modified Hoagland's solution (Table S5). The  
222 experimental design was a randomised block comprised of 94 genotypes split over 11 experimental runs with a target of 20  
223 replications per genotype ( $n = 8 - 36$ ). The RSA of each seedling was extracted from the images and stored in Root System  
224 Markup Language (RSML, Lobet *et al.*, 2015) using the root tracing software RootNav (Pound *et al.*, 2013). Root traits  
225 were quantified using RootNav standard functions and additional measurements as described in Atkinson *et al.* (2015). The  
226 shoot length and area were extracted from the shoot images using custom macros in the FIJI software package (Schindelin  
227 *et al.*, 2012) (macro code available in Data S1). Definitions for all extracted traits are in Table 1. Analysis of variance of  
228 the raw plant data was conducted using R package “lmerTest” (Kuznetsova *et al.*, 2017) with random effects by  
229 experimental run. Broad-sense heritability ( $h^2$ ) was calculated using the equation  $h^2 = \sigma_g^2 / (\sigma_g^2 + \sigma_e^2)$  where  $\sigma_g^2$  and  $\sigma_e^2$   
230 are the genetic and residual variances respectively (Falconer & Mackay, 1996). A principal component analysis (PCA) and  
231 correlation matrices were applied using R Stats Package v3.6.2 and “FactoMineR” (Husson *et al.*, 2019) using the scaled  
232 mean values to explore the relationships between the traits and genotypes within the dataset. Finally, a correlation matrix  
233 was generated using R Statistics package “corrplot” (Wei & Simko, 2017) using the raw plant data from both treatments to  
234 determine overall correlations between traits.

### 235 4.3 Quantitative trait locus mapping

236 Detection of QTL and calculation of estimates for additive effects were conducted using the R Statistics package “R/qrtl”  
237 (Broman *et al.*, 2003). The map used was a high-density Savannah × Rialto iSelect map obtained from Wang *et al.* (2014)  
238 with redundant and closer than 0.5 cM markers stripped out reducing the number of effective markers from 46977 to 9239  
239 markers. Average marker density by chromosome ranged between 0.16 and 4.23 markers per cM. Before QTL analysis,  
240 best linear unbiased predictions (BLUPs) were calculated for traits showing variance between experimental runs and best  
241 linear unbiased estimations (BLUEs) calculated for all other traits (Atkinson *et al.*, 2015; Henderson, 1975; Theil, 1970)  
242 (Data S2). QTL were identified based on the composite interval mapping (CIM) via extended Haley–Knott regression  
243 (Haley & Knott, 1992). The threshold logarithm of the odds (LOD) scores and effects were calculated by 1000 ×  
244 permutation test at  $p < 0.05$  level (Churchill & Doerge, 1994). After the analysis, an additional threshold was applied for

245 declaring presence of a QTL with a minimum LOD score of 2.0. The annotated linkage map was generated using R Statistics  
246 package “LinkageMapView” (Ouellette *et al.*, 2018).

#### 247 4.4 RNA-sequencing of candidate QTL

248 RNA-seq was used to identify underlying genes for a candidate seminal root angle QTL (LOD 3.0) located on chromosome  
249 2D, found under low nitrate conditions. One sample group was comprised of lines that had the candidate QTL (Group A:  
250 lines 17, 20, 36, 68) and the second sample group did not have the QTL (Group B: lines 6, 8, 11, 52). All pooled root  
251 samples of plants grown under low nitrate were collected at the same time and immediately frozen using liquid nitrogen  
252 and stored at -80°C. Each sample group had four RNA biological replicates where each replicate was a pool of roots from  
253 three plants per line (12 plants per RNA sample). Total RNA was isolated from 500–1000 mg of homogenised root tissue  
254 (TRIzol reagent). RNA quality and purity were determined using a NanoDrop™ 2000c with values above 500 ng  $\mu\text{L}^{-1}$  or  
255 higher accepted. Illumina 75bp Paired-End Multiplexed RNA sequencing was performed using a using NextSeq 500 by  
256 Source Bioscience (Nottingham, UK).

257 Differential gene expression analysis was conducted using the IWGSC RefSeq v1.1 assembly (International Wheat Genome  
258 Sequencing Consortium, 2018) ([http://plants.ensembl.org/Triticum\\_aestivum/](http://plants.ensembl.org/Triticum_aestivum/)) and the TGAC v1 Chinese Spring reference  
259 sequence (Clavijo *et al.*, 2017). Raw sequencing reads were trimmed for adapter sequence and for regions where the average  
260 quality per base dropped below 15 (Trimmomatic version 0.32) (Bolger *et al.*, 2014). After trimming, reads below 40 bp  
261 were eliminated from the dataset. Trimmed reads were aligned to the reference sequences assembly using splice-aware  
262 aligner HISAT2 (Pertea *et al.*, 2016). Uniquely mapped reads were selected, and duplicate reads filtered out. Unmapped  
263 reads across all samples were assembled into transcripts using MaSuRCA software and sequences 250 bp or larger taken  
264 forward (Zimin *et al.*, 2013). Unmapped reads were re-aligned to these assembled transcripts individually and added to  
265 their sample specific reads while the assembled transcripts were combined with the reference sequence and GTF annotation  
266 for downstream investigations. StringTie software was used to calculate gene and transcript abundances for each sample  
267 across the analysis specific annotated genes (Pertea *et al.*, 2016). The sequencing read depth and alignment statistics are  
268 provided in Table S3. Finally, DEseq was used to visualise results and identify differential expression between samples  
269 (Anders & Huber, 2010). Differentially expressed genes were compared between the IWGSC RefSeq v1.1 and TGAC v1  
270 reference assemblies to identify overlap using BLAST (BLASTN, e-value 1e-05, identity 95%, minimum length 40bp)  
271 (Altschul *et al.*, 1990). The top matches for each gene between the reference sequences were used to allow an integrative  
272 and comprehensive annotation of genes. Gene ontology (GO) analysis was performed with the latest genome for *T. aestivum*  
273 (IWGSC RefSeq v1.1 assembly) in g:Profiler (Reimand *et al.*, 2016) using the tailor made algorithm g:SCS for computing  
274 multiple testing correction for p-values gained from the GO enrichment analysis. A p-value threshold of 0.05 was applied  
275 with only results passing this threshold reported.

#### 276 4.5 Phylogenetic analysis

277 A phylogenetic analysis of protein families was conducted to compare the protein sequences of *A. thaliana*, *O. sativa* L.  
278 and *T. aestivum* L. proton-dependent oligopeptide transporter (NPF) families (also known as the NRT1/PTR family). *A.*  
279 *thaliana* sequences were obtained from (Léran *et al.*, 2014). Using the latest genome for *T. aestivum* (IWGSC RefSeq  
280 v1.1 assembly) and *O. sativa* (MSU Release 7.0, Kawahara *et al.*, 2013, <https://phytozome.jgi.doe.gov/>) a HMM profile  
281 search was conducted (Krogh *et al.*, 2001). The resulting list of proteins were scanned using Pfam (El-Gebali *et al.*,  
282 2019). Only single gene models of candidate genes with PTR2 domains were retained. The protein sequences were used  
283 to generate a maximum-likelihood tree using the software RAXML (Stamatakis, 2014). The exported tree file (.NWK)  
284 was then visualised using the R package “ggtree” (Yu *et al.*, 2017) and used for phylogenetic tree construction. The  
285 exported tree file (.NWK) was visualised using the R package “ggtree” (Yu *et al.*, 2017).

## 286 5 Data availability statement

287 The RNA-seq dataset is available (study PRJEB40436) from the European Nucleotide Archive  
288 (<http://www.ebi.ac.uk/ena/data/view/PRJEB40436>).

## 289 6 Funding

290 This work was supported by the Biotechnology and Biological Sciences Research Council [grant number BB/M001806/1,  
291 BB/L026848/1, BB/P026834/1] (MJB, DMW, and MPP); the Leverhulme Trust [grant number RPG-2016-409] (MJB and  
292 DMW); the European Research Council FUTUREROOTS Advanced Investigator grant [grant number 294729] to MG,  
293 JAA, DMW, and MJB; and the University of Nottingham Future Food Beacon of Excellence.



294 **7 Disclosures**

295 Conflicts of interest: No conflicts of interest declared

296 **8 Acknowledgments**

297 The authors would like to thank Limagrain UK Ltd for the use of the S×R DH population and Luzie U. Wingen (John Innes  
298 Centre) for providing rQTL scripts used in this work.

299 **9 References**

- 300 Akpinar B A, Kantar M, and Budak H. (2015) Root precursors of microRNAs in wild emmer and modern wheats show  
301 major differences in response to drought stress. *Funct Integr Genomics*. **15**, 587–598.
- 302 An D, Su J, Liu Q, Zhu Y, Tong Y, Li J, et al. (2006) Mapping QTLs for nitrogen uptake in relation to the early growth  
303 of wheat (*Triticum aestivum* L.). *Plant Soil*. **284**, 73–84.
- 304 Atkinson J A, Wingen, L U, Griffiths M, Pound M P, Gaju O, Foulkes M J, et al. (2015) Phenotyping pipeline reveals  
305 major seedling root growth QTL in hexaploid wheat. *J Exp Bot*. **66**, 2283–2292.
- 306 Bai C, Liang Y, and Hawkesford M J. (2013) Identification of QTLs associated with seedling root traits and their  
307 correlation with plant height in wheat. *J Exp Bot*. **64**, 1745–1753.
- 308 Beyer S, Daba S, Tyagi P, Bockelman H, Brown-Guedira G, and Mohammadi M. (2019) Loci and candidate genes  
309 controlling root traits in wheat seedlings—a wheat root GWAS. *Funct Integr Genomics*. **19**, 91–107.
- 310 Bolger A M, Lohse M, and Usadel B. (2014) Trimmomatic: A flexible trimmer for Illumina sequence data.  
311 *Bioinformatics*. **30**, 2114–2120.
- 312 Broman K W, Wu H, Sen Ś, and Churchill G A. (2003) R/qtl: QTL mapping in experimental crosses. *Bioinformatics*. **19**,  
313 889–890.
- 314 Churchill G A, and Doerge R W. (1994) Empirical threshold values for quantitative trait mapping. *Genetics*. **138**, 963–  
315 971.
- 316 Clark R T, Famoso A N, Zhao K, Shaff J E, Craft E J, Bustamante C D, et al. (2013) High-throughput two-dimensional  
317 root system phenotyping platform facilitates genetic analysis of root growth and development. *Plant, Cell Environ*.  
318 **36**, 454–466.
- 319 Dawson J C, Huggins D R, and Jones S S. (2008) Characterizing nitrogen use efficiency in natural and agricultural  
320 ecosystems to improve the performance of cereal crops in low-input and organic agricultural systems. *F Crop Res*.  
321 **107**, 89–101.
- 322 Delogu G, Cattivelli L, Pecchioni N, De Falcis D, Maggiore T, and Stanca A M. (1998) Uptake and agronomic efficiency  
323 of nitrogen in winter barley and winter wheat. *Eur J Agron*. **9**, 11–20.
- 324 Edgar R C. (2004) MUSCLE: Multiple sequence alignment with high accuracy and high throughput. *Nucleic Acids Res*.  
325 **32**, 1792–1797.
- 326 El-Gebali S, Mistry J, Bateman A, Eddy S R, Luciani A, Potter S C, et al. (2019) The Pfam protein families database in  
327 2019. *Nucleic Acids Res*. **47**, D427–D432.
- 328 Falconer D S. (1996) Introduction to Quantitative Genetics (Fourth Edition), 4th Editio. ed. Longman Group Ltd.,  
329 London.

- 330 Fang Z, Xia K, Yang X, Grotemeyer M S, Meier S, Rentsch D, et al. (2013) Altered expression of the PTR/NRT1  
331 homologue OsPTR9 affects nitrogen utilization efficiency, growth and grain yield in rice. *Plant Biotechnol J.* 11,  
332 446–458.
- 333 FAO. (2017). World fertilizer Trends and Outlook to 2020. Food and Agriculture Organization of the United Nations.  
334 Rome, Italy. Available online at: <http://www.fao.org/3/a-i6895e.pdf> (Accessed January 20, 2019).
- 335 Gaju O, Allard V, Martre P, Snape J W, Heumez E, LeGouis J, et al. (2011) Identification of traits to improve the  
336 nitrogen-use efficiency of wheat genotypes. *F Crop Res.* 123, 139–152.
- 337 Gelli M, Duo Y, Konda A R, Zhang C, Holding D, and Dweikat I. (2014) Identification of differentially expressed genes  
338 between sorghum genotypes with contrasting nitrogen stress tolerance by genome-wide transcriptional profiling.  
339 *BMC Genomics.* 15, 1–16.
- 340 Good A G, Johnson S J, De Pauw M, Carroll R T, Savidov N, Vidmar J, et al. (2007) Engineering nitrogen use efficiency  
341 with alanine aminotransferase. *Can J Bot.* 85, 252–262.
- 342 Guo Y, Kong F mei, Xu Y feng, Zhao Y, Liang X, Wang Y ying, et al. (2012) QTL mapping for seedling traits in wheat  
343 grown under varying concentrations of N, P and K nutrients. *Theor Appl Genet.* 124, 851–865.
- 344 Habash, D.Z., Bernard, S., Schondelmaier, J., Weyen, J., and Quarrie, S.A. (2007) The genetics of nitrogen use in  
345 hexaploid wheat: N utilisation, development and yield. *Theor Appl Genet.* 114, 403–419.
- 346 Haley C S, and Knott S A. (1992) A simple regression method for mapping quantitative trait loci in line crosses using  
347 flanking markers. *Heredity.* 69, 315–324.
- 348 Henderson C R. (1975). Best Linear Unbiased Estimation and Prediction under a Selection Model. *Biometrics.* 31, 423–  
349 44.
- 350 Ho C H, Lin S H, Hu H C, and Tsay Y F. (2009) CHL1 Functions as a Nitrate Sensor in Plants. *Cell.* 138, 1184–1194.
- 351 Hodge A, Berta G, Doussan C, Merchan F, and Crespi M. (2009) Plant root growth, architecture and function, *Plant and*  
352 *Soil.* 321, 153-187.
- 353 Huang N C, Liu K H, Lo H J, and Tsay Y F. (1999) Cloning and functional characterization of an Arabidopsis nitrate  
354 transporter gene that encodes a constitutive component of low-affinity uptake. *Plant Cell.* 11, 1381–1392.
- 355 Husson F, Josse J, Le S, and Maintainer J M. (2019) R Package “FactoMineR”: Multivariate exploratory data analysis  
356 and data mining [WWW Document]. URL <https://github.com/husson/FactoMineR>
- 357 International Wheat Genome Sequencing Consortium. (2018) Shifting the limits in wheat research and breeding using a  
358 fully annotated reference genome. *Science.* 361.
- 359 Kanno Y, Hanada A, Chiba Y, Ichikawa T, Nakazawa M, Matsui M, et al. (2012) Identification of an abscisic acid  
360 transporter by functional screening using the receptor complex as a sensor. *Proc Natl Acad Sci USA.* 109, 9653–  
361 9658.
- 362 Kant S, Bi Y M, and Rothstein S J. (2011) Understanding plant response to nitrogen limitation for the improvement of  
363 crop nitrogen use efficiency. *J Exp Bot.* 62, 1499–1509.
- 364 Kawahara Y, de la Bastide M, Hamilton J P, Kanamori H, McCombie W R, Ouyang S, et al. (2013) Improvement of the  
365 oryza sativa nipponbare reference genome using next generation sequence and optical map data. *Rice.* 6, 3–10.
- 366 Krogh A, Larsson B, Von Heijne G, and Sonnhammer E L L. (2001) Predicting transmembrane protein topology with a  
367 hidden Markov model: Application to complete genomes. *J Mol Biol.* 305, 567–580.

- 368 Krouk G, Lacombe B, Bielach A, Perrine-Walker F, Malinska K, Mounier E, et al. (2010) Nitrate-regulated auxin  
369 transport by NRT1.1 defines a mechanism for nutrient sensing in plants. *Dev Cell*. 18, 927–937.
- 370 Kuznetsova A, Brockhoff P B, Christensen R H B. (2017). lmerTest Package: Tests in Linear Mixed Effects Models. *J*  
371 *Stat Softw*. 82.
- 372 Landjeva S, Neumann K, Lohwasser U, and Börner A. (2008) Molecular mapping of genomic regions associated with  
373 wheat seedling growth under osmotic stress. *Biol Plant*. 52, 259–266.
- 374 Lark R M, Milne A E, Addiscott T M, Goulding K W T, Webster C P, O’Flaherty S. (2004). Scale- and location-  
375 dependent correlation of nitrous oxide emissions with soil properties: An analysis using wavelets. *Eur J Soil Sci*.  
376 55, 611–627.
- 377 L éran S, Varala K, Boyer J C, Chiurazzi M, Crawford N, Daniel-Vedele F, et al. (2014) A unified nomenclature of nitrate  
378 transporter 1/peptide transporter family members in plants. *Trends Plant Sci*. 19, 5–9.
- 379 Liu X, Li R, Chang X, and Jing R. (2013) Mapping QTLs for seedling root traits in a doubled haploid wheat population  
380 under different water regimes. *Euphytica*. 189, 51–66.
- 381 Lobet G, Pound M P, Diener J, Pradal C, Draye X, Godin C, et al. (2015) Root system markup language: Toward a  
382 unified root architecture description language. *Plant Physiol*. 167, 617–627.
- 383 Miller A J, Fan X, Orsel M, Smith S J, Wells D M. (2007). Nitrate transport and signalling. *J Exp Bot*. 58, 2297–2306.
- 384 Mooney S J, Pridmore T P, Helliwell J, and Bennett M J. (2012) Developing X-ray computed tomography to non-  
385 invasively image 3-D root systems architecture in soil. *Plant Soil*. 352, 1–22.
- 386 Oono Y, Kawahara Y, Yazawa T, Kanamori H, Kuramata M, Yamagata H, et al. (2013) Diversity in the complexity of  
387 phosphate starvation transcriptomes among rice cultivars based on RNA-Seq profiles. *Plant Mol Biol*. 83, 523–537.
- 388 Ouellette L A, Reid R W, Blanchard S G, and Brouwer C R. (2018) LinkageMapView-rendering high-resolution linkage  
389 and QTL maps. *Bioinformatics*. 34, 306–307.
- 390 Pertea M, Kim D, Pertea G M, Leek J T, and Salzberg S L. (2016) RNA-seq experiments with HISAT , StringTie and  
391 Ballgown. *Nat Protoc*. 11, 1650–1667.
- 392 Pound M P, French A P, Atkinson J A, Wells D M, Bennett M J, and Pridmore T. (2013) RootNav: Navigating images of  
393 complex root architectures. *Plant Physiol*. 162, 1802–1814.
- 394 Raudvere U, Kolberg L, Kuzmin I, Arak T, Adler P, Peterson H, et al. (2019) G:Profiler: A web server for functional  
395 enrichment analysis and conversions of gene lists (2019 update). *Nucleic Acids Res*. 47, W191–W198.
- 396 Remans T, Nacry P, Pervent M, Filleur S, Diatloff E, Mounier E, et al. (2006) The Arabidopsis NRT1.1 transporter  
397 participates in the signaling pathway triggering root colonization of nitrate-rich patches. *Proc Natl Acad Sci USA*.  
398 103, 19206–19211.
- 399 Ren Y, He X, Liu D, Li J, Zhao X, Li B, et al. (2012) Major quantitative trait loci for seminal root morphology of wheat  
400 seedlings. *Mol Breed*. 30, 139–148.
- 401 Rich S M, Christopher J, Richards R, Watt M. (2020). Root phenotypes of young wheat plants grown in controlled  
402 environments show inconsistent correlation with mature root traits in the field. *J Exp Bot*. 71, 4751–4762.
- 403 Schindelin J, Arganda-Carrera I, Frise E, Verena K, Mark L, Tobias P, et al. (2009) Fiji - an Open platform for biological  
404 image analysis. *Nat Methods*. 9.

- 405 Stamatakis A. (2014) RAxML version 8: A tool for phylogenetic analysis and post-analysis of large phylogenies.  
406 *Bioinformatics*. 30, 1312–1313.
- 407 Sun J jie, Guo Y, Zhang Gui zhi, Gao, M gang, Zhang Guo hua, Kong F. mei, et al. (2013) QTL mapping for seedling  
408 traits under different nitrogen forms in wheat. *Euphytica*. 191, 317–331.
- 409 Theil H. (1971). Best Linear Unbiased Estimation and Prediction. In: Principles of Econometrics. John Wiley & Sons,  
410 New York. 119–124.
- 411 Trachsel S, Kaeppler S M, Brown K M, and Lynch J P. (2013) Maize root growth angles become steeper under low N  
412 conditions. *F Crop Res*. 140, 18–31.
- 413 Wang S, Wong D, Forrest K, Allen A, Chao S, Huang B E, et al. (2014). Characterization of polyploid wheat genomic  
414 diversity using a high-density 90 000 single nucleotide polymorphism array. *Plant Biotechnol J*. 12, 787–796.
- 415 Watt M, Moosavi S, Cunningham S C, Kirkegaard J A, Rebetzke G J, Richards R A. (2013). A rapid, controlled-  
416 environment seedling root screen for wheat correlates well with rooting depths at vegetative, but not reproductive,  
417 stages at two field sites. *Ann Bot*. 112, 447–455.
- 418 Wei T, Simko V. (2017) R package ‘corrplot’: Visualization of a Correlation Matrix (Version 0.84) [WWW Document].  
419 URL <https://github.com/taiyun/corrplot> (accessed 7.28.20).
- 420 Xu C, Zhang H, Sun J, Guo Z, Zou C, Li W X, et al. (2018) Genome-wide association study dissects yield components  
421 associated with low-phosphorus stress tolerance in maize. *Theor Appl Genet*. 131, 1699–1714.
- 422 Yang M, Wang C R, Hassan M A, Wu Y Y, Xia X. (2020) QTL mapping of seedling biomass and root traits under  
423 different nitrogen conditions in bread wheat (*Triticum aestivum* L.). *J Integr Agric*. 19, 2–14.
- 424 Yu G, Smith D K, Zhu H, Guan Y, and Lam T T Y. (2017) Ggtree: an R Package for Visualization and Annotation of  
425 Phylogenetic Trees With Their Covariates and Other Associated Data. *Methods Ecol Evol*. 8, 28–36.
- 426 Yu P, Eggert K, von Wirén N, Li C, and Hochholdinger F. (2015) Cell type-specific gene expression analyses by RNA  
427 sequencing reveal local high nitrate-triggered lateral root initiation in shoot-borne roots of maize by modulating  
428 auxin-related cell cycle regulation. *Plant Physiol*. 169, 690–704.
- 429 Zhang H, Cui F, Wang L, Li J, Ding A, Zhao C, et al. (2013) Conditional and unconditional QTL mapping of drought-  
430 tolerance-related traits of wheat seedling using two related RIL populations. *J Genet*. 92, 213–231.
- 431 Zimin A V, Marçais G, Puiu D, Roberts M, Salzberg S L, and Yorke J A. (2013) The MaSuRCA genome assembler.  
432 *Bioinformatics*. 29, 2669–2677.
- 433 Zurek P R, Topp C N, and Benfey P N. (2015) Quantitative trait locus mapping reveals regions of the maize genome  
434 controlling root system architecture. *Plant Physiol*. 167, 1487–1496.
- 435

436 10 Tables

437 **Table 1.** Definition of plant traits measured.

| Acronym | Definition                                                                                             | Software | Units                 |
|---------|--------------------------------------------------------------------------------------------------------|----------|-----------------------|
| RAE1    | Angle of emergence between the outermost seminal roots measured at 30 px                               | RootNav  | Degrees (°)           |
| RAE1001 | Angle of emergence between outermost pair of seminal roots measured at root tip                        | RootNav  | Degrees (°)           |
| RAE1002 | Angle of emergence between innermost pair of seminal roots measured at root tip                        | RootNav  | Degrees (°)           |
| RAE2    | Angle of emergence between innermost pair of seminal roots measured at 30 px                           | RootNav  | Degrees (°)           |
| RAE251  | Angle of emergence between outermost pair of seminal roots measured at first quartile of total length  | RootNav  | Degrees (°)           |
| RAE252  | Angle of emergence between innermost pair of seminal roots measured at first quartile of total length  | RootNav  | Degrees (°)           |
| RAE501  | Angle of emergence between outermost pair of seminal roots measured at second quartile of total length | RootNav  | Degrees (°)           |
| RAE502  | Angle of emergence between innermost pair of seminal roots measured at first quartile of total length  | RootNav  | Degrees (°)           |
| RAE751  | Angle of emergence between outermost pair of seminal roots measured at third quartile of total length  | RootNav  | Degrees (°)           |
| RAE752  | Angle of emergence between innermost pair of seminal roots measured at third quartile of total length  | RootNav  | Degrees (°)           |
| RAE951  | Angle of emergence between outermost pair of seminal roots measured at 95 px                           | RootNav  | Degrees (°)           |
| RAE952  | Angle of emergence between innermost pair of seminal roots measured at 95 px                           | RootNav  | Degrees (°)           |
| RCH     | Convex hull - area of the smallest convex polygon to enclose the root system                           | RootNav  | mm <sup>2</sup>       |
| RCHCX   | Convex hull centroid - horizontal co-ordinate                                                          | RootNav  | mm                    |
| RCHCY   | Convex hull centroid - vertical co-ordinate                                                            | RootNav  | mm                    |
| RCMX    | Root centre of mass- horizontal co-ordinate                                                            | RootNav  | mm                    |
| RCMY    | Root centre of mass - vertical co-ordinate                                                             | RootNav  | mm                    |
| RLC     | Number of lateral roots                                                                                | RootNav  | Dimensionless (Count) |
| RMD     | Maximum depth of the root system                                                                       | RootNav  | mm                    |
| RMW     | Maximum width of the root system                                                                       | RootNav  | mm                    |
| RWDR    | Width-depth ratio (MW/MD)                                                                              | RootNav  | Dimensionless (Ratio) |
| RSC     | Number of seminal roots                                                                                | RootNav  | Dimensionless (Count) |
| RTLA    | Total length of all roots                                                                              | RootNav  | mm                    |
| RTLL    | Total length of lateral roots                                                                          | RootNav  | mm                    |
| RTLS    | Total length of seminal roots                                                                          | RootNav  | mm                    |
| SA      | Shoot area                                                                                             | FIJI     | mm <sup>2</sup>       |
| SH      | Shoot height                                                                                           | FIJI     | mm                    |

438

439 **Table 2.** QTLs for wheat seedling traits detected in the S×R DH population grown in hydroponics (LOD > 2.0). Trait  
440 units as Table 1. Note: shoot data available for low nitrate conditions only.

| Trait | Treat | QTL | Marker interval <sup>a</sup>                     | Site <sup>b</sup><br>(cM) | LOD <sup>c</sup> | Additive<br>effect <sup>d</sup> | PVE <sup>e</sup><br>(%) |
|-------|-------|-----|--------------------------------------------------|---------------------------|------------------|---------------------------------|-------------------------|
| RTL A | LN    | 6D  | BobWhite_c7090_522-BS00023964                    | 5.0                       | 27.4             | -229                            | 65.0                    |
|       |       | 7D  | wsnp_Ku_c416_869895-BS00028760_51                | 26.0                      | 8.4              | -107                            | 11.3                    |
|       | HN    | 6D  | BobWhite_c7090_522-BS00023964                    | 4.4                       | 23.0             | -201                            | 57.4                    |
|       |       | 7D  | wsnp_Ku_c416_869895-BS00028760_51                | 27.0                      | 8.7              | -111                            | 14.3                    |
| RTL S | LN    | 6D  | BobWhite_c7090_522-BS00023964                    | 5.0                       | 33.5             | -198                            | 70.5                    |
|       |       | 7D  | wsnp_Ku_c416_869895-BS00028760_51                | 26.0                      | 11.3             | -86                             | 12.1                    |
|       | HN    | 6D  | BobWhite_c7090_522-BS00023964                    | 4.4                       | 24.8             | -168                            | 59.9                    |
|       |       | 7D  | wsnp_Ku_c416_869895-BS00028760_51                | 27.0                      | 9.4              | -91.2                           | 14.4                    |
| RTL L | LN    | 1A  | BS00004043-BS00000226                            | 215.0                     | 2.3              | -9.0                            | 6.2                     |
|       |       | 6D  | BobWhite_c7090_522-BS00023964                    | 8.0                       | 13.4             | -31.2                           | 48.0                    |
|       | HN    | 6D  | BS00009514-BS00023964                            | 4.4                       | 6.3              | -32.8                           | 28.0                    |
| RAE1  | HN    | 3B  | BobWhite_c22370_352-wsnp_RFL_Contig3336_3426054  | 178.8                     | 2.2              | -11.0                           | 10.8                    |
| RAE2  | HN    | 3B  | GENE-1154_396-wsnp_RFL_Contig3336_3426054        | 178.8                     | 2.8              | -8.2                            | 13.3                    |
| RLC   | LN    | 1A  | BS00004043-BS00000226                            | 216.0                     | 4.9              | -2.4                            | 8.6                     |
|       |       | 6D  | BobWhite_c7090_522-BS00023964                    | 5.0                       | 19.6             | -9.4                            | 52.8                    |
|       |       | 7D  | wsnp_Ku_c416_869895-BS00028760_51                | 22.0                      | 6.0              | -4.4                            | 10.9                    |
| RSC   | LN    | 6D  | BS00009514-BS00022787                            | 4.4                       | 3.2              | 0.2                             | 13.1                    |
|       |       | 7D  | wsnp_Ku_c416_869895-IAAV4624                     | 23.0                      | 3.8              | -0.2                            | 15.8                    |
|       | HN    | 7A  | Excalibur_c48636_283-wsnp_RFL_Contig2864_2688208 | 12.0                      | 2.9              | 0.2                             | 13.7                    |
| RCH   | LN    | 6D  | BobWhite_c7090_522-BS00023964                    | 4.4                       | 31.1             | -8464                           | 80.0                    |
|       |       | 6D  | BobWhite_c7090_522-BS00023964                    | 4.4                       | 18.4             | -7118                           | 53.5                    |
|       |       | 7D  | wsnp_Ku_c416_869895-Kukri_c46303_512             | 34.0                      | 4.2              | -3309                           | 8.3                     |
| RMW   | LN    | 1B  | IAAV3905-wsnp_RFL_Contig3951_4390396             | 12.5                      | 3.6              | -8.9                            | 5.0                     |
|       |       | 6D  | BobWhite_c7090_522-BS00023964                    | 4.4                       | 26.7             | -48.5                           | 72.8                    |
|       | HN    | 4D  | wsnp_Ex_c9440_15657149-wsnp_Ku_c16354_25219645   | 23.9                      | 3.1              | 10.8                            | 7.1                     |
|       |       | 6D  | BS00009514-BS00023964                            | 4.4                       | 16.4             | -36.2                           | 54.6                    |
| RMD   | LN    | 6D  | BobWhite_c7090_522-BS00023964                    | 4.4                       | 31.5             | -71.4                           | 75.1                    |
|       |       | 7D  | wsnp_Ku_c416_869895-BS00021859                   | 27.0                      | 3.7              | -20.6                           | 3.8                     |
|       | HN    | 6D  | BobWhite_c7090_522-BS00023964                    | 4.4                       | 21.8             | -60.3                           | 58.8                    |
|       |       | 7D  | wsnp_Ku_c416_869895-BS00028760_51                | 30.0                      | 5.2              | -26.6                           | 8.6                     |
| RMWD  | LN    | 1B  | RAC875_c2185_1138-BobWhite_c23617_167            | 86.2                      | 2.2              | -0.03                           | 10.5                    |
|       | HN    | 4D  | wsnp_Ex_c9440_15657149-BS00065168                | 4.8                       | 3.1              | 0.1                             | 14.6                    |
| RCMX  | LN    | 6D  | BS00009514-BS00023964                            | 6.0                       | 2.3              | 1.6                             | 11.2                    |
|       |       | 1A  | GENE-0249_122-BS00075532_51                      | 145.0                     | 4.1              | -1.7                            | 16.6                    |
|       |       | 6D  | BS00009514-BS00023964                            | 22.0                      | 4.0              | 1.5                             | 16.3                    |
| RCMY  | LN    | 6D  | BobWhite_c7090_522-BS00023964                    | 4.4                       | 31.9             | -23.1                           | 80.8                    |
|       | HN    | 6D  | BobWhite_c7090_522-BS00023964                    | 4.4                       | 19.5             | -19.3                           | 63.5                    |
| RCHCX | LN    | 6D  | BS00009514-BS00023964                            | 4.4                       | 2.3              | 2.5                             | 11.2                    |

|         |    |    |                                            |       |      |       |      |
|---------|----|----|--------------------------------------------|-------|------|-------|------|
|         | HN | 6D | BS00009514-BS00023964                      | 18.0  | 3.2  | 2.14  | 12.9 |
|         |    | 7D | wsnp_Ku_c416_869895-IAAV4624               | 21.0  | 3.2  | 2.6   | 13.1 |
| RCHCY   | LN | 6D | BobWhite_c7090_522-BS00023964              | 4.4   | 34.1 | -40.0 | 82.9 |
|         | HN | 3B | BS00064778-BS00075879                      | 216.2 | 4.9  | 7.11  | 6.8  |
|         |    | 6D | BobWhite_c7090_522-BS00023964              | 4.4   | 25.0 | -33.9 | 62.1 |
|         |    | 7D | wsnp_Ku_c416_869895-Kukri_c46303_512       | 32.0  | 5.8  | -14.4 | 8.2  |
| RAE951  | HN | 3B | RAC875_c5799_224-wsnp_Ra_c7158_12394405    | 178.8 | 2.8  | -7.7  | 13.3 |
| RAE251  | HN | 3B | BobWhite_c22370_352-wsnp_CAP11_c323_263800 | 178.8 | 3.6  | -7.7  | 17.0 |
| RAE252  | HN | 4D | wsnp_Ex_c9440_15657149-BS00065168          | 0.8   | 2.8  | 6.5   | 13.4 |
| RAE501  | HN | 4D | wsnp_Ex_c9440_15657149-BS00065168          | 0.8   | 2.9  | 6.3   | 14.0 |
| RAE502  | HN | 4D | wsnp_Ex_c9440_15657149-BS00065168          | 0.8   | 3.0  | 6.4   | 14.2 |
| RAE751  | LN | 2D | BS00010393-BS00066132_51                   | 160.0 | 2.6  | 5.1   | 12.5 |
|         | HN | 4D | wsnp_Ex_c9440_15657149-BS00024014          | 0.8   | 2.9  | 6.3   | 13.8 |
| RAE752  | HN | 4D | wsnp_Ex_c9440_15657149-BS00065168          | 0.8   | 2.1  | 5.3   | 10.4 |
| RAE1001 | LN | 2D | BS00010393-BS00066132_51                   | 160.0 | 3.0  | 5.5   | 14.3 |
|         | HN | 4D | wsnp_Ex_c9440_15657149-BS00024014          | 0.8   | 2.4  | 6.0   | 11.9 |
| SA      | LN | 6D | BobWhite_c7090_522-BS00023964              | 8.0   | 24.4 | -1.0  | 61.4 |
|         |    | 7D | wsnp_Ku_c416_869895-                       | 29.0  | 7.0  | -0.6  | 10.6 |
| SH      | LN | 6D | BS00009514-BS00023964                      | 4.4   | 19.3 | -0.6  | 54.5 |
|         |    | 7D | wsnp_Ku_c416_869895-Kukri_c46303_512       | 31.0  | 6.0  | -0.3  | 11.7 |

441 <sup>a</sup> Chromosome region of the QTL defined by two flanking markers

442 <sup>b</sup> Genetic position of the QTL peak value

443 <sup>c</sup> Logarithm of the odds value

444 <sup>d</sup> Additive effects of putative QTL; a positive value indicates that positive alleles are from Rialto; negative values indicate positive alleles are from Savannah

446 <sup>e</sup> Percentage of phenotypic variation explained by putative QTL

447

448 **Table 3.** Candidate genes for seminal root angle QTL located on chromosome 2D that were consistently expressed across  
 449 the Group A replicates versus zero reads mapping in one or more Group B replicates. Gene naming convention according  
 450 to IWGSC RefSeq v1.1. Genes that are present on a chromosome that is not chromosome 2D represent variation between  
 451 the IWGSC RefSeq v1.1 and the TGACv1 assembly.

| Gene                    | Log <sub>2</sub> fold change | Adjusted p value (q value) | Functional annotation                              |
|-------------------------|------------------------------|----------------------------|----------------------------------------------------|
| TraesCS2D02G088100      | 1.29                         | 0.036                      | C2H2-type zinc finger                              |
| TraesCS2D02G108500      | 1.38                         | 0.026                      | Peroxidase                                         |
| TraesCS2D02G129100      | 1.36                         | 0.036                      | Legume lectin domain                               |
| MSTRG.42598<br>(TGACv1) | 1.31                         | 0.041                      | Unknown                                            |
| TraesCS2B02G126600      | 2.21                         | 9.5E-06                    | Unknown                                            |
| TraesCS6A02G175000      | 1.66                         | 0.002                      | Nuclear pore complex scaffold,<br>nucleoporin      |
| TraesCS2D02G270000      | 1.66                         | 0.002                      | Helix-loop-helix DNA-binding domain                |
| TraesCS2D02G330200      | 1.44                         | 0.013                      | Unknown                                            |
| TraesCS2A02G111200      | 2.12                         | 2.5E-05                    | Kelch motif                                        |
| TraesCS2D02G344400      | 1.45                         | 0.013                      | Unknown                                            |
| TraesCS2D02G348400      | 1.88                         | 3.6E-04                    | NPF4                                               |
| MSTRG.40366<br>(TGACv1) | 2.02                         | 8.9E-05                    | Unknown                                            |
| TraesCS4B02G057100      | 1.48                         | 0.013                      | Unknown                                            |
| TraesCS2D02G441300      | 1.29                         | 0.037                      | AAA domain UvrD/REP helicase N-<br>terminal domain |
| TraesCS2D02G487000      | 1.53                         | 0.008                      | DUF wound-responsive family protein                |
| TraesCS2D02G509700      | 1.73                         | 0.002                      | Peroxidase                                         |
| TraesCS2D02G511200      | 1.41                         | 0.025                      | Peroxidase                                         |

452



453 11 Legends to Figures

454 **Fig. 1.** High-throughput hydroponic phenotyping system for seedling root & shoot traits. (A) Growth assembly and plant  
455 imaging station. (B) Example image of a wheat root grown on germination paper 10 days after germination. (C) Root  
456 system extraction to RSML database using RootNav software. (D) Measurement of root traits from RSML database. (E)  
457 Example image of a wheat shoot 10 days after germination. (F) Shoot image colour thresholding & shoot measurement  
458 using FIJI. (G) Example of QTL peak extracted from phenotyping data & mapping data with rQTL.

459  
460 **Fig. 2.** (A) PCA ordination results for S×R doubled haploid population and parents under high and low nitrate regimes.  
461 Arrows indicate directions and contributions of loadings for each trait. (B) Correlation matrix of extracted root traits  
462 averaged between nitrate treatments. Correlations are colour coded from strong positive correlation in red to strong  
463 negative correlation in blue with no correlation shown in white.

464  
465 **Fig. 3.** Molecular linkage map showing position of QTLs detected in the S×R DH population grown in hydroponics  
466 (LOD > 2.0). QTLs and confidence regions for all root traits are colour labelled by nitrate condition, low nitrate (blue),  
467 high nitrate (red) and nitrate treatment independent (green). Shoot QTLs found in the low nitrate study are shown in grey.

468  
469 **Fig. 3.** Molecular linkage map showing position of QTLs detected in the S×R DH population grown in hydroponics  
470 (LOD > 2.0). QTLs and confidence regions for all root traits are colour labelled for low N-dependent (blue), high N-  
471 dependent (red) and N treatment independent (green). Shoot QTL found in low N study are shown in grey. Marker  
472 density (MD) per chromosome is displayed as average cM per 1 marker.

473  
474 **Fig. 4.** (A) Distribution of means for seminal root angle (RAE1001) for S×R doubled haploid population under two  
475 nitrate regimes. Labelled non-parental lines were selected for RNA-seq. (B) Boxplot and (C) overlay plot for lines  
476 selected for RNA-seq with differential seminal root angle (RAE1001).

477  
478 **Fig. 5.** GO enrichment analysis for top Biological process GO terms with the highest p-value for up- and down-regulated  
479 genes in the sample group with a candidate seminal root angle QTL compared to without the QTL.

480  
481 **Fig. 6.** Phylogenetic tree of protein families comparing the protein sequences of *A. thaliana*, *O. sativa* L. and *T. aestivum*  
482 L. NPF family proteins to an identified candidate *T. aestivum*. protein. The candidate *T. aestivum*. protein is situated in a  
483 monocot specific outgroup within a NPF4 protein clade (highlighted in red). Branch lengths are proportional to  
484 substitution rate.

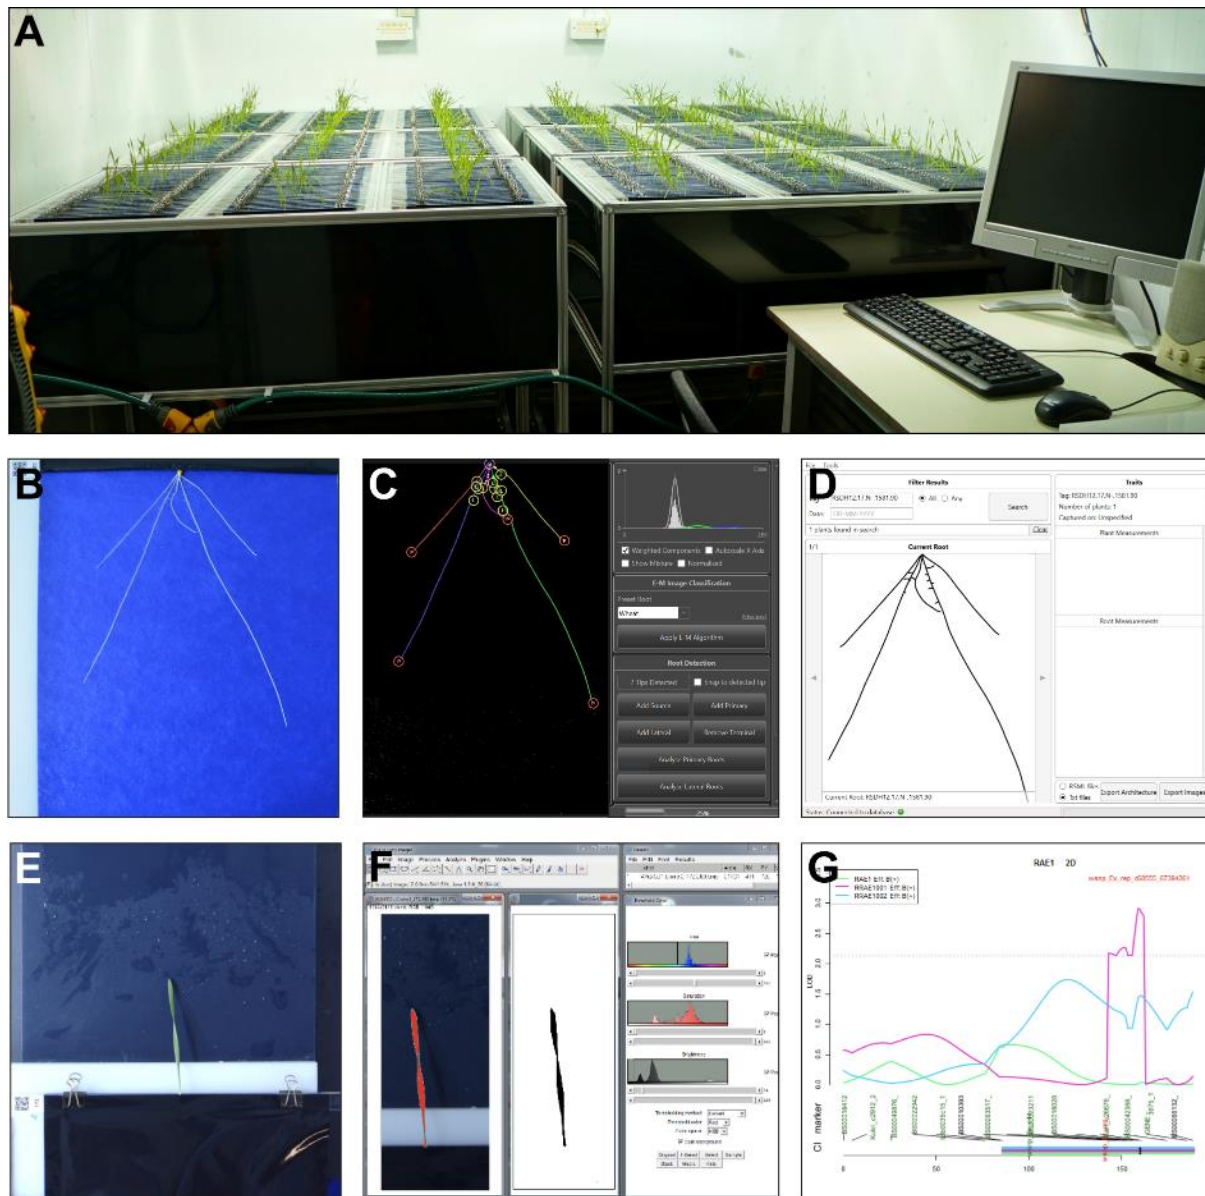

**Figure 1.** High-throughput hydroponic phenotyping system for seedling root & shoot traits. (A) Growth assembly and plant imaging station. (B) Example image of a wheat root grown on germination paper 10 DAG. (C) Root system extraction to RSML database using RootNav software. (D) Measurement of root traits from RSML database. (E) Example image of a wheat shoot 10 DAG. (F) Shoot image colour thresholding & shoot measurement using FIJI. (G) Example of QTL peak extracted from phenotyping data & mapping data with rQTL.

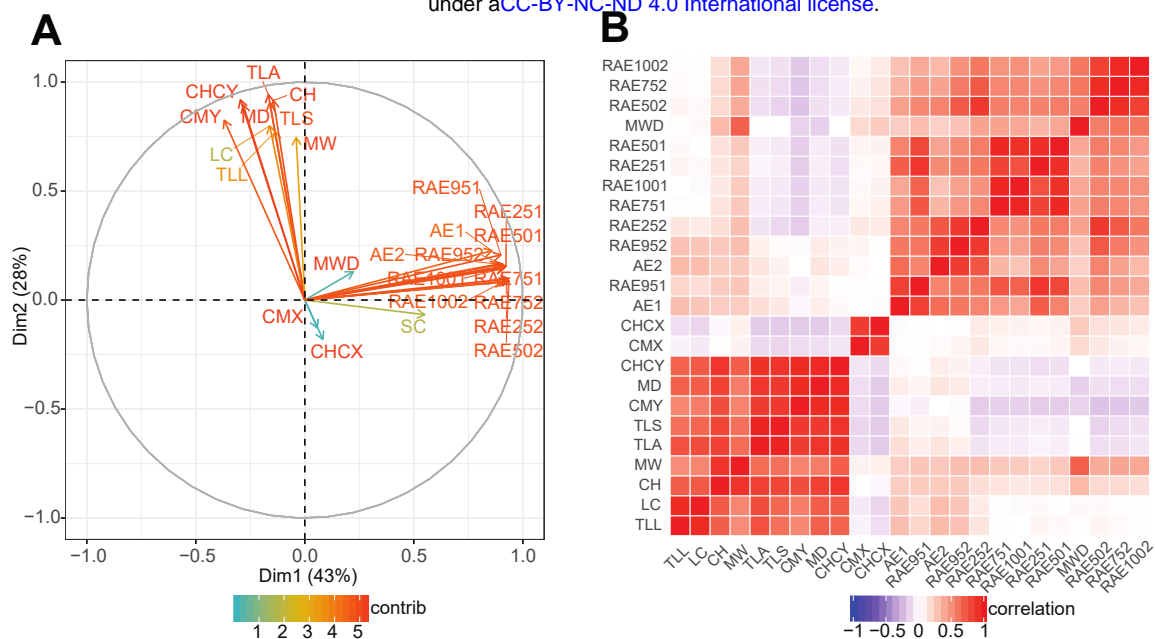

**Figure 2.** (A) PCA ordination results for S×R doubled haploid population and parents under high and low nitrate regimes. Arrows indicate directions and contributions of loadings for each trait. (B) Correlation matrix of extracted root traits averaged between nitrate treatments. Correlations are colour coded from strong positive correlation in red to strong negative correlation in blue with no correlation shown in white.

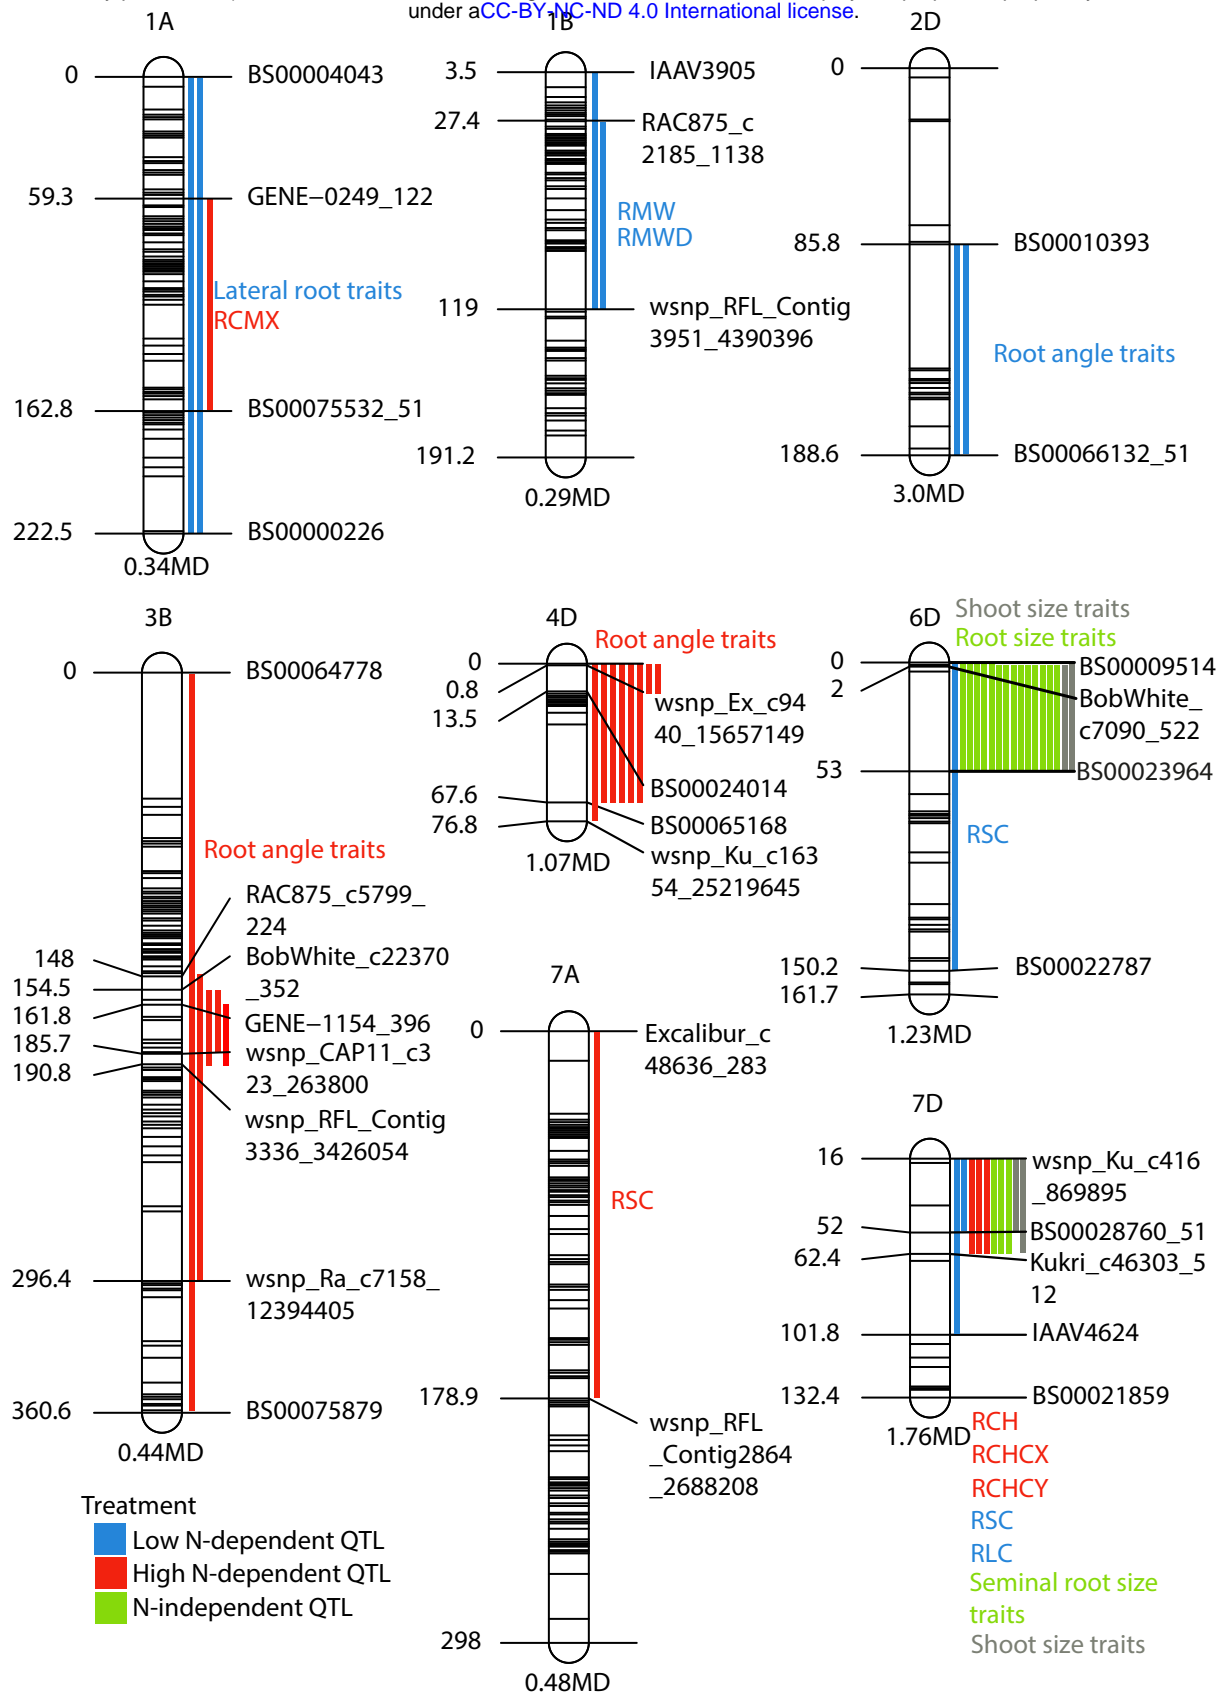

**Figure 3.** Molecular linkage map showing position of QTLs detected in the S×R DH population grown in hydroponics (LOD > 2.0). QTLs and confidence regions for all root traits are colour labelled by nitrate condition, low nitrate (blue), high nitrate (red) and nitrate treatment independent (green). Shoot QTLs found in the low nitrate study are shown in grey.

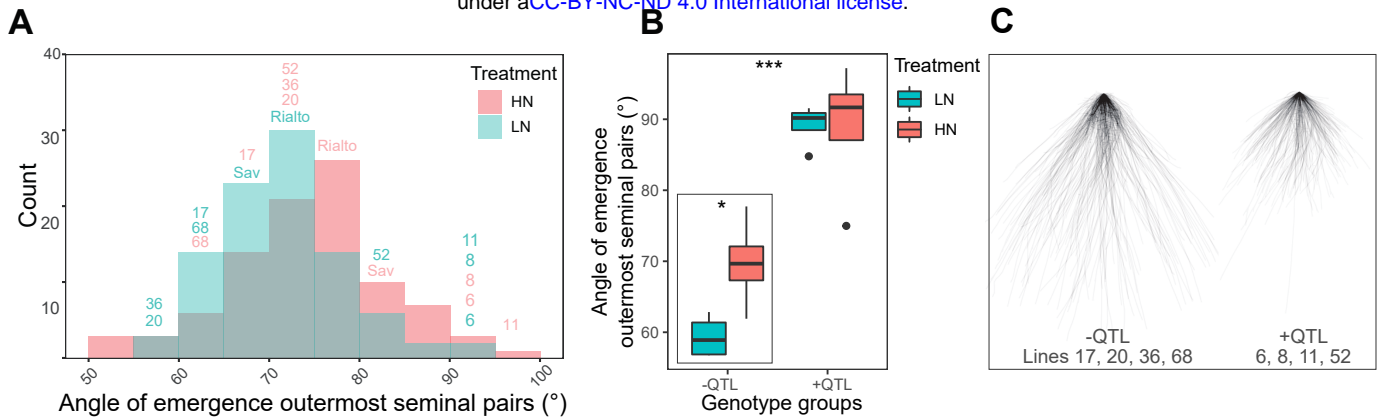

**Figure 4.** (A) Distribution of means for seminal root angle (RAE1001) for S×R doubled haploid population under two nitrate regimes. Labeled non-parental lines were selected for RNA-seq. (B) Boxplot and (C) overlay plot for lines selected for RNA-seq with differential seminal root angle (RAE1001).

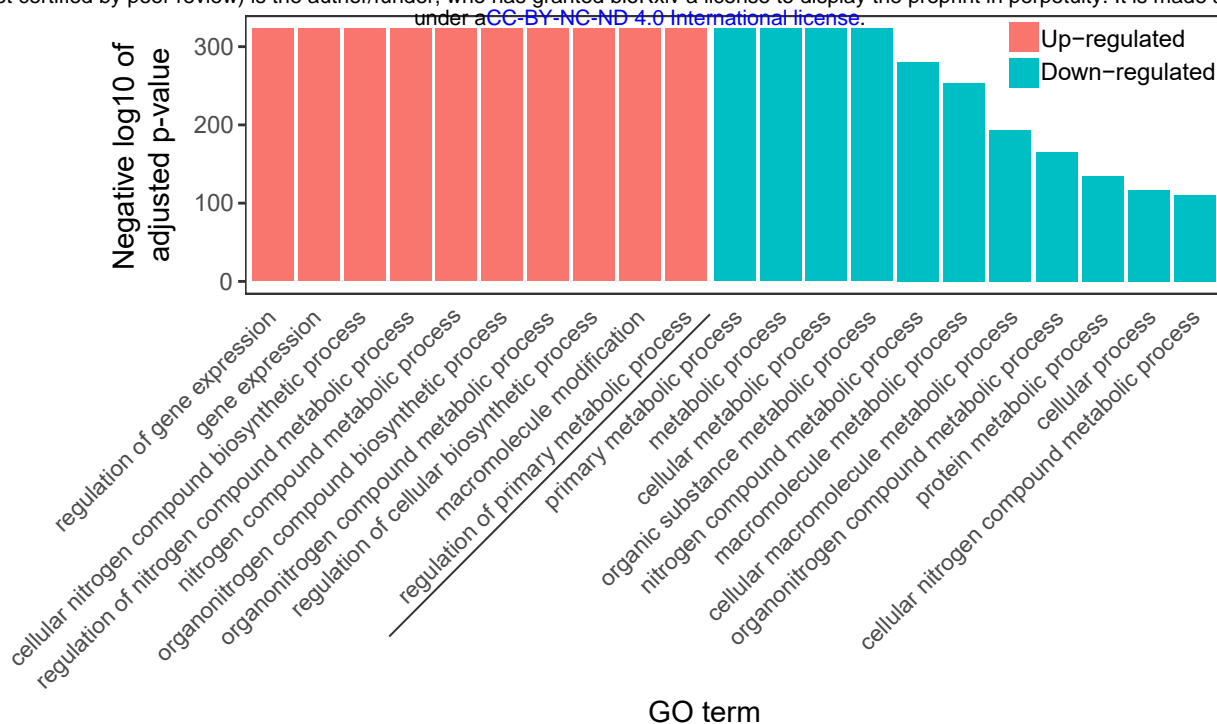

**Figure 5.** GO enrichment analysis for top Biological process GO terms with the highest p-value for up- and down-regulated genes in the sample group with a candidate seminal root angle QTL compared to without the QTL.

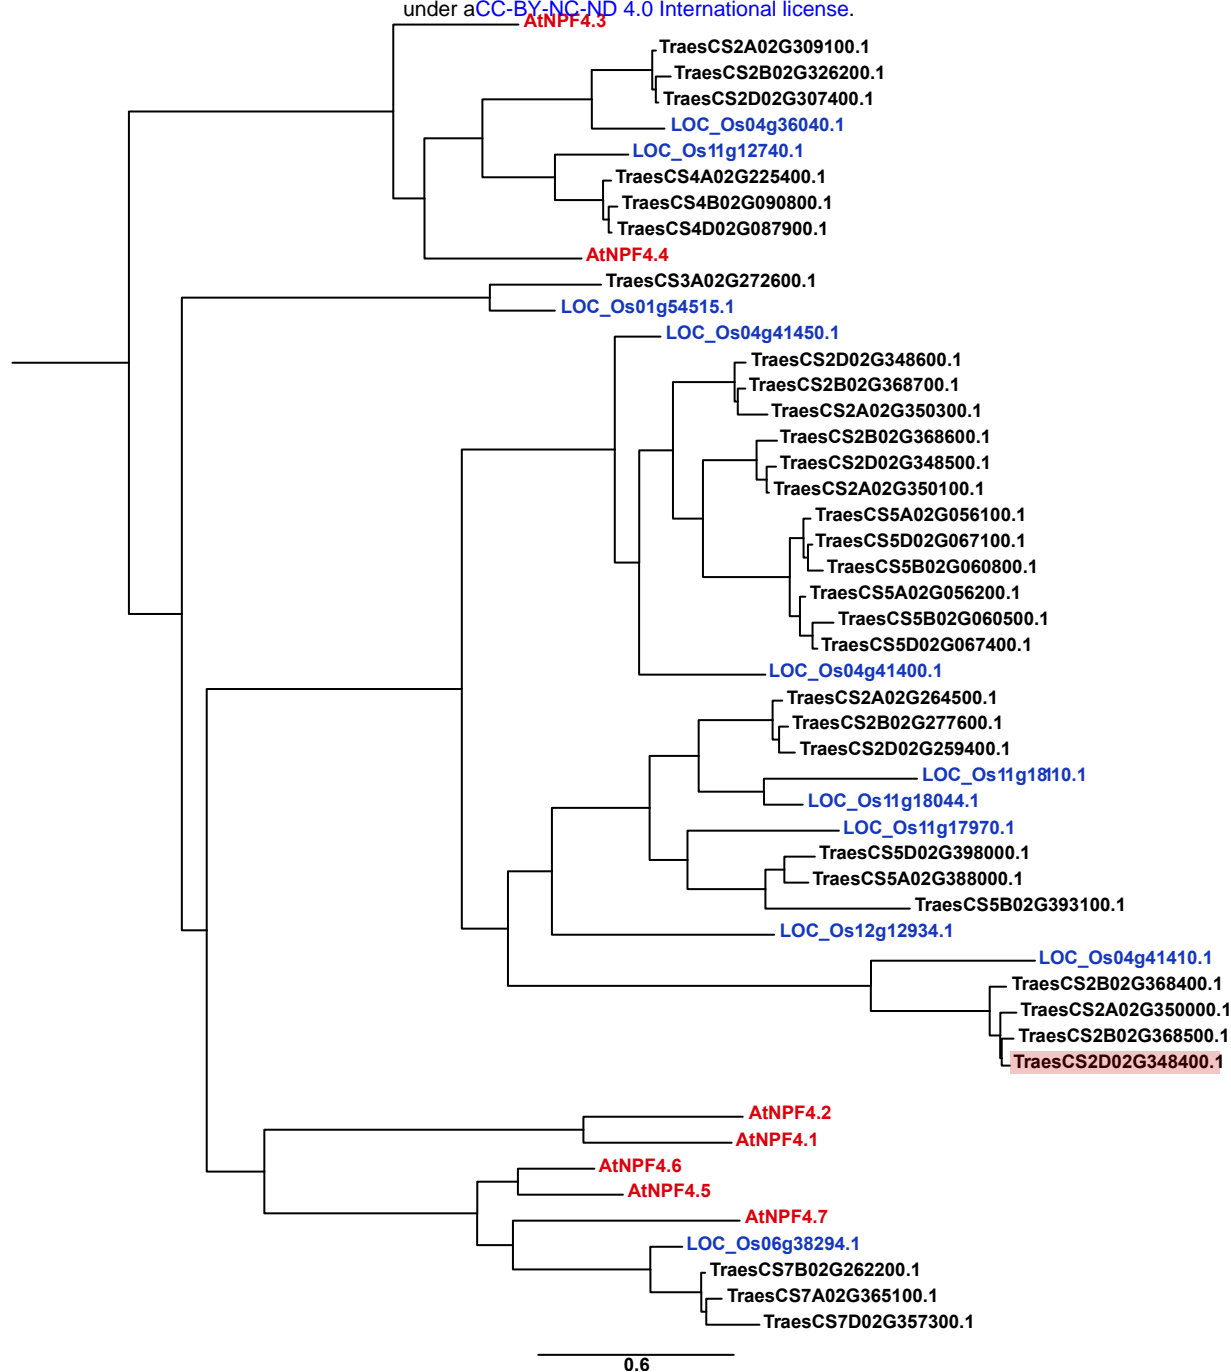

**Figure 6.** Phylogenetic tree of protein families comparing the protein sequences of *A. thaliana*, *O. sativa* L. and *T. aestivum* L. NPF family proteins to an identified candidate *T. aestivum* protein. The candidate *T. aestivum* protein is situated in a monocot specific outgroup within a NPF4 protein clade (highlighted in red). Branch lengths are proportional to substitution rate.
